# Supplementary material for: Expression and Functional Contribution of Different Organic Cation Transporters to the Cellular Uptake of Doxorubicin into Human Breast Cancer and Cardiac Tissue
Source: MDPI journal article supplement (doi:10.3390/ijms23010255), 2021-12-27
Supplement: s1 [file s1]

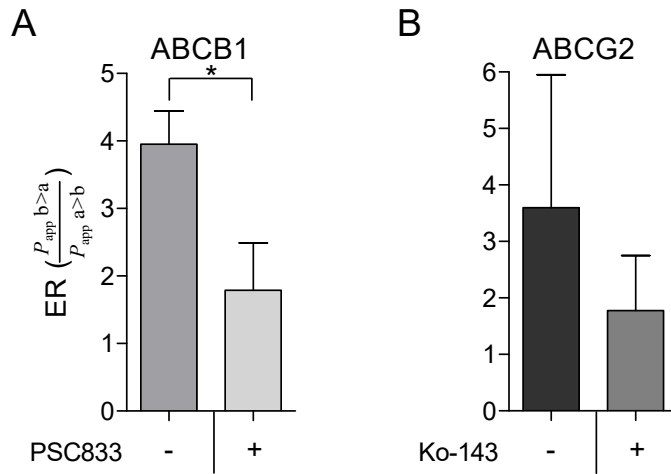

**Figure S1:** Calculated efflux ratios (ER) of the vectorial transport of doxorubicin in presence (+) or absence (-) of the ABCB1-inhibitor PSC833 or the ABCG2-inhibitor Ko143, respectively, in MDCKII cells stably transfected with **(A)** ABCB1 or **(B)** ABCG2. Cells were seeded on Transwell® filters and Papp-values were calculated for the basolateral (b) to apical (a) ( $P_{app\ b>a}$ ) transport and vice versa ( $P_{app\ a>b}$ ) of 100  $\mu\text{mol/L}$  doxorubicin (data given as mean  $\pm$  SD; n=3; \*p<0.05).
